# Supplementary material for: Liquid Chromatography–High-Resolution Mass Spectrometry (LC-HRMS) Fingerprinting and Chemometrics for Coffee Classification and Authentication
Source: MDPI journal article supplement (doi:10.3390/molecules29010232), 2023-12-31
Supplement: s1 [file s1]

## Supplementary Material

# Liquid Chromatography–High-Resolution Mass Spectrometry (LC-HRMS) Fingerprinting and Chemometrics for Coffee Classification and Authentication

Nerea Núñez <sup>1,2\*</sup>, Javier Saurina <sup>1,2</sup> and Oscar Núñez <sup>1,2,3</sup>

<sup>1</sup> Department of Chemical Engineering and Analytical Chemistry, University of Barcelona, Martí Franquès 1-11, E08028 Barcelona, Spain; xavi.saurina@ub.edu (J.S.); oscar.nunez@ub.edu (O.N.)

<sup>2</sup> Research Institute in Food Nutrition and Food Safety, University of Barcelona, Recinte Torribera, Av. Prat de la Riba 171, Edifici de Recerca (Gaudí), Santa Coloma de Gramenet, E08921 Barcelona, Spain

<sup>3</sup> Serra Hùnter Fellow, Departament de Recerca i Universitats, Generalitat de Catalunya, Via Laietana 2, E08003 Barcelona, Spain

\* Correspondence: nereant7@gmail.com

**Table S1.** Accuracy, sensitivity, specificity and classification error obtained for calibration and prediction on paired PLS-DA models for set 1, 2 and 3 according to the geographical production region.

| Class                     | LVs | Calibration  |                 |                 |                          | Prediction   |                 |                 |                          |
|---------------------------|-----|--------------|-----------------|-----------------|--------------------------|--------------|-----------------|-----------------|--------------------------|
|                           |     | Accuracy (%) | Sensitivity (%) | Specificity (%) | Classification Error (%) | Accuracy (%) | Sensitivity (%) | Specificity (%) | Classification Error (%) |
| Set 1                     |     |              |                 |                 |                          |              |                 |                 |                          |
| Ethiopia                  | 2   | 100          | 100             | 94.7            | 2.6                      | 100          | 100             | 84              | 8                        |
| Brazil                    | 2   | 100          | 100             | 98.6            | 0.7                      | 94.7         | 66.7            | 87.5            | 22.9                     |
| Central and South America | 2   | 100          | 100             | 93.1            | 3.4                      | 100          | 100             | 90.6            | 4.7                      |
| India                     | 2   | 100          | 100             | 100             | 0                        | 94.7         | 66.7            | 100             | 16.7                     |
| Uganda                    | 2   | 100          | 100             | 100             | 0                        | 100          | 100             | 100             | 0                        |
| Set 2                     |     |              |                 |                 |                          |              |                 |                 |                          |
| Colombia                  | 2   | 89.2         | 84.6            | 90              | 12.7                     | 97.2         | 83.3            | 100             | 8.3                      |
| Ethiopia                  | 2   | 98.7         | 92.9            | 98.6            | 4.3                      | 94.4         | 100             | 90              | 5                        |
| India                     | 2   | 95.2         | 92.9            | 95.7            | 5.7                      | 94.6         | 100             | 93.3            | 3.3                      |
| Indonesia                 | 2   | 94.3         | 92.9            | 92.8            | 7.2                      | 86.1         | 50              | 73.3            | 38.3                     |
| Nicaragua                 | 3   | 90.2         | 92.9            | 89.9            | 8.6                      | 69.4         | 16.7            | 80              | 51.7                     |
| Set 3                     |     |              |                 |                 |                          |              |                 |                 |                          |
| Cambodia                  | 2   | 100          | 100             | 100             | 0                        | 100          | 100             | 100             | 0                        |
| Vietnam                   | 2   | 100          | 100             | 100             | 0                        | 100          | 100             | 100             | 0                        |

**Table S2.** Accuracy, sensitivity, specificity and classification error obtained for calibration and prediction on paired PLS-DA models for set 1 and 2 according to the roasting degree.

| Class                                 | LVs | Calibration  |                 |                 |                          | Prediction   |                 |                 |                          |
|---------------------------------------|-----|--------------|-----------------|-----------------|--------------------------|--------------|-----------------|-----------------|--------------------------|
|                                       |     | Accuracy (%) | Sensitivity (%) | Specificity (%) | Classification Error (%) | Accuracy (%) | Sensitivity (%) | Specificity (%) | Classification Error (%) |
| Coffee geographical production region |     |              |                 |                 |                          |              |                 |                 |                          |
| 1/5                                   | 3   | 100          | 100             | 94.7            | 2.6                      | 100          | 100             | 92              | 4                        |
| 2/5                                   | 3   | 97.6         | 92.9            | 97.3            | 4.9                      | 100          | 100             | 93.8            | 3.1                      |
| 4/5                                   | 2   | 100          | 100             | 97.7            | 1.1                      | 89.7         | 78.9            | 100             | 42.1                     |
| Coffee variety                        |     |              |                 |                 |                          |              |                 |                 |                          |
| 2/5                                   | 3   | 90           | 89.3            | 90.9            | 9.9                      | 75           | 91.7            | 62.5            | 22.9                     |
| 3/5                                   | 3   | 98.2         | 100             | 98              | 1                        | 91.7         | 66.7            | 96.7            | 18.3                     |
| 4/5                                   | 3   | 96.1         | 96.4            | 94.5            | 4.5                      | 63.9         | 58.3            | 75              | 33.3                     |
| 5/5                                   | 3   | 97.6         | 91.7            | 98.6            | 4.9                      | 83.3         | 66.7            | 80              | 26.7                     |

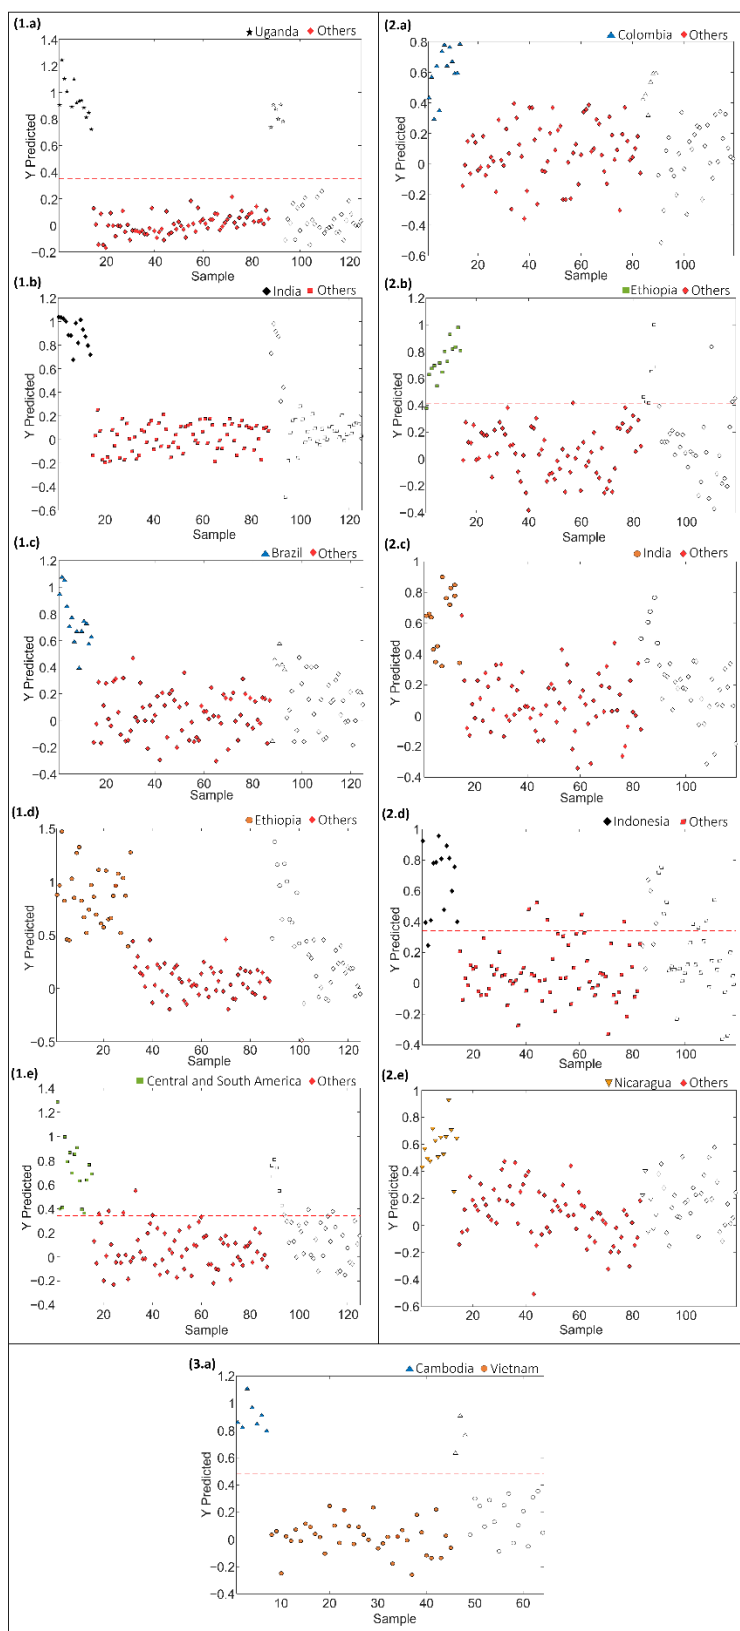

**Figure S1.** Paired PLS-DA plots of Y predicted *vs.* samples for set 1: (1.a) Uganda *vs.* Others, (1.b) India *vs.* Others, (1.c) Brazil *vs.* Others, (1.d) Ethiopia *vs.* Others, (1.e) Central and South America *vs.* Others, for set 2: (2.a) Colombia *vs.* Others, (2.b) Ethiopia *vs.* Others, (2.c) India *vs.* Others, (2.d) Indonesia *vs.* Others, (2.e) Nicaragua *vs.* Others, and for set 3: (3.a) Cambodia *vs.* Vietnam. Filled and empty symbols correspond to calibration and prediction sets, respectively. Red lines represent the threshold between classes.

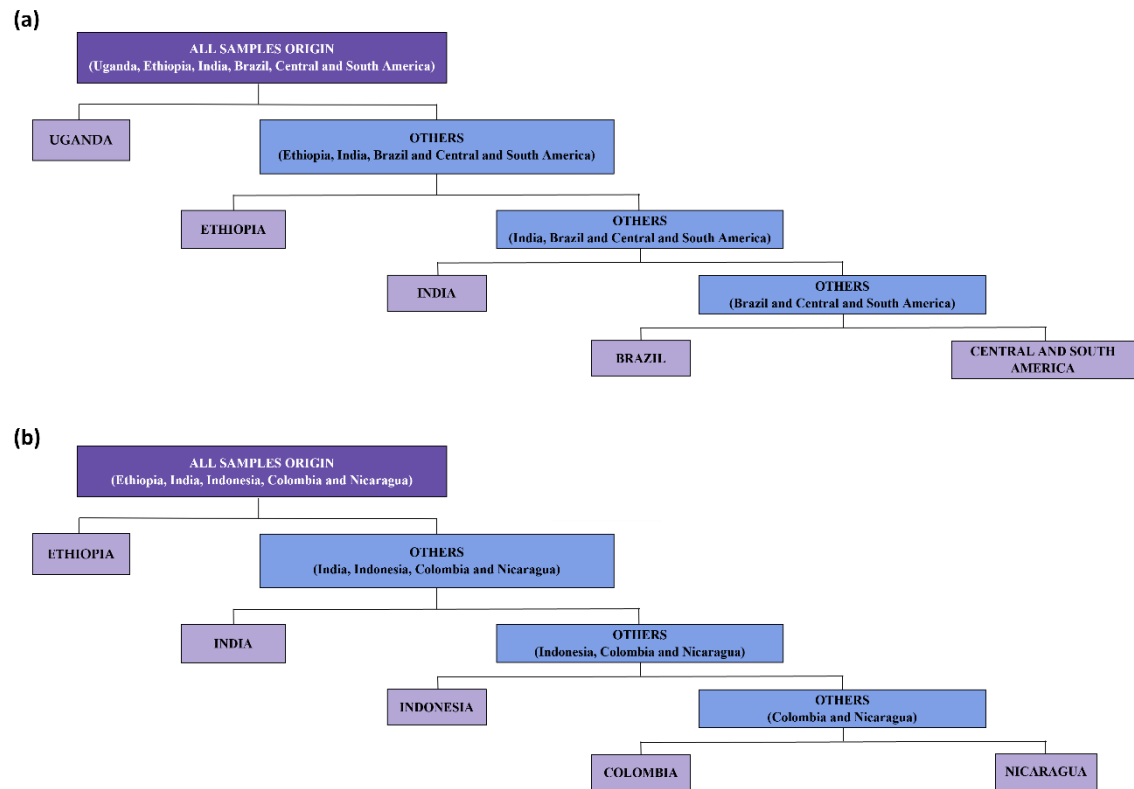

**Figure S2.** Classification scheme based on the geographical production region of coffee in tree structure for (a) set 1 and (b) set 2.

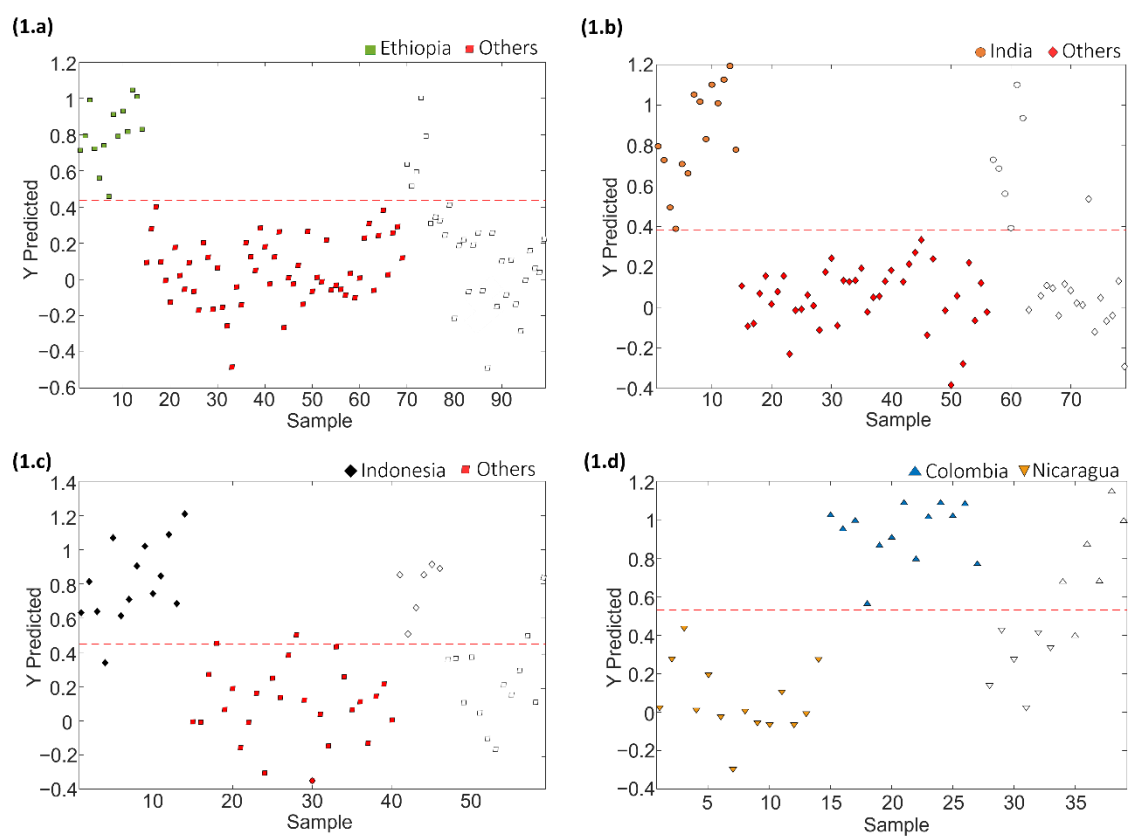

**Figure S3.** Paired PLS-DA plots of Y predicted *vs.* samples for set 2 within the tree classification framework: (1.a) Ethiopia *vs.* Others, (1.b) India *vs.* Others, (1.c) Indonesia *vs.* Others, and (1.d) Colombia *vs.* Nicaragua. Filled and empty symbols correspond to calibration and prediction sets, respectively. Red lines represent the threshold between classes.

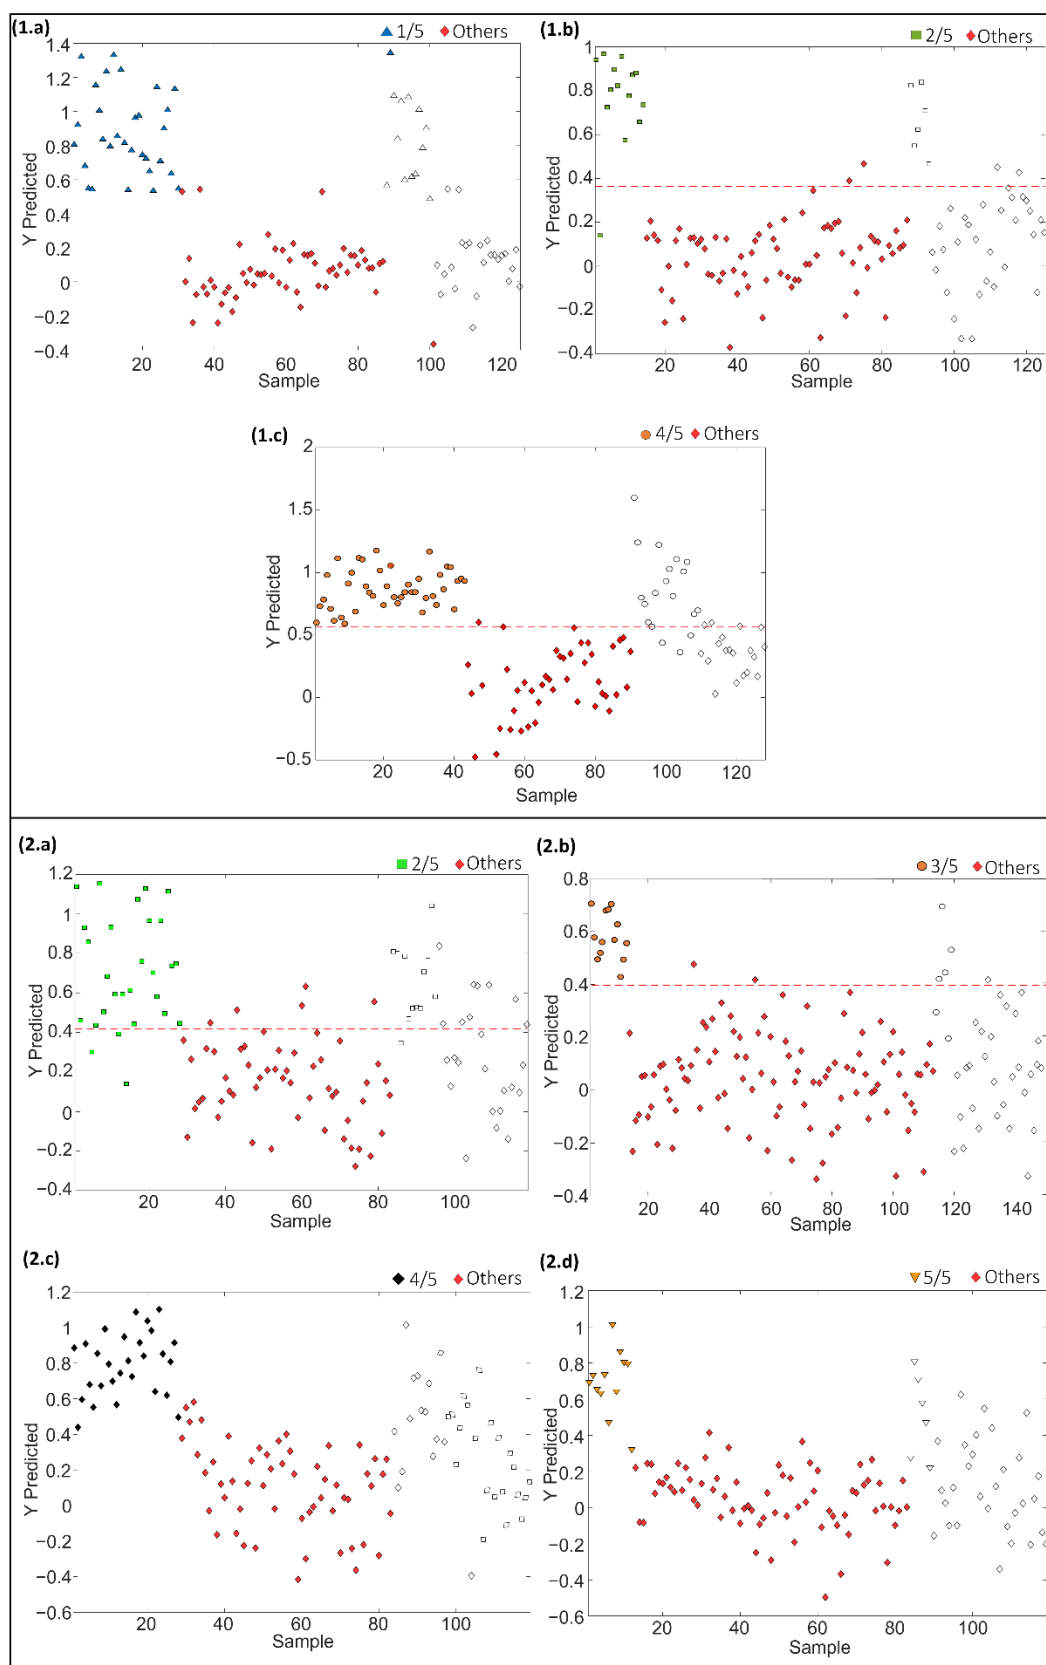

**Figure S4.** Paired PLS-DA plots of Y predicted *vs.* samples for set 1: (1.a) 1/5 *vs.* Others, (1.b) 2/5 *vs.* Others, and (1.c) 4/5 *vs.* Others, for set 2: (2.a) 2/5 *vs.* Others, (2.b) 3/5 *vs.* Others, (2.c) 4/5 *vs.* Others and, (2.d) 5/5 *vs.* Others. Filled and empty symbols correspond to calibration and prediction sets, respectively. Red lines represent the threshold between classes.

(a)

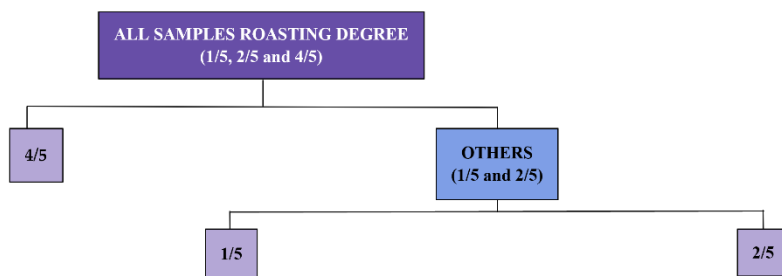

(b)

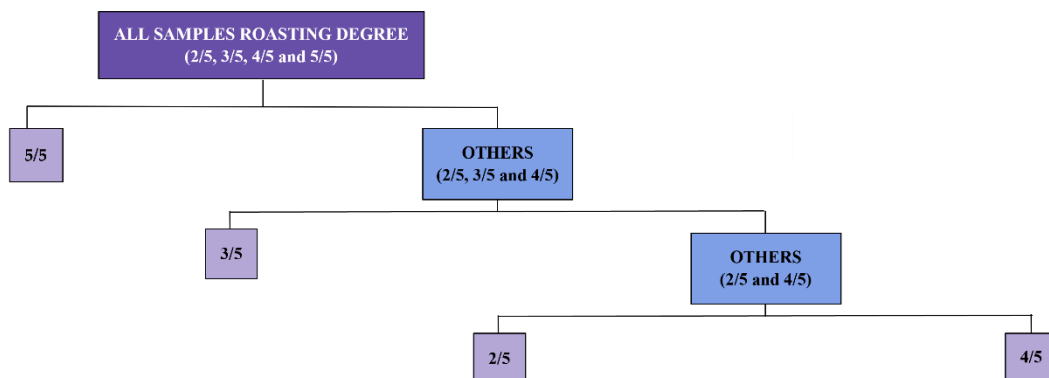

**Figure S5.** Classification scheme based on the roasting degree of coffee in tree structure for (a) set 1 and (b) set 2.

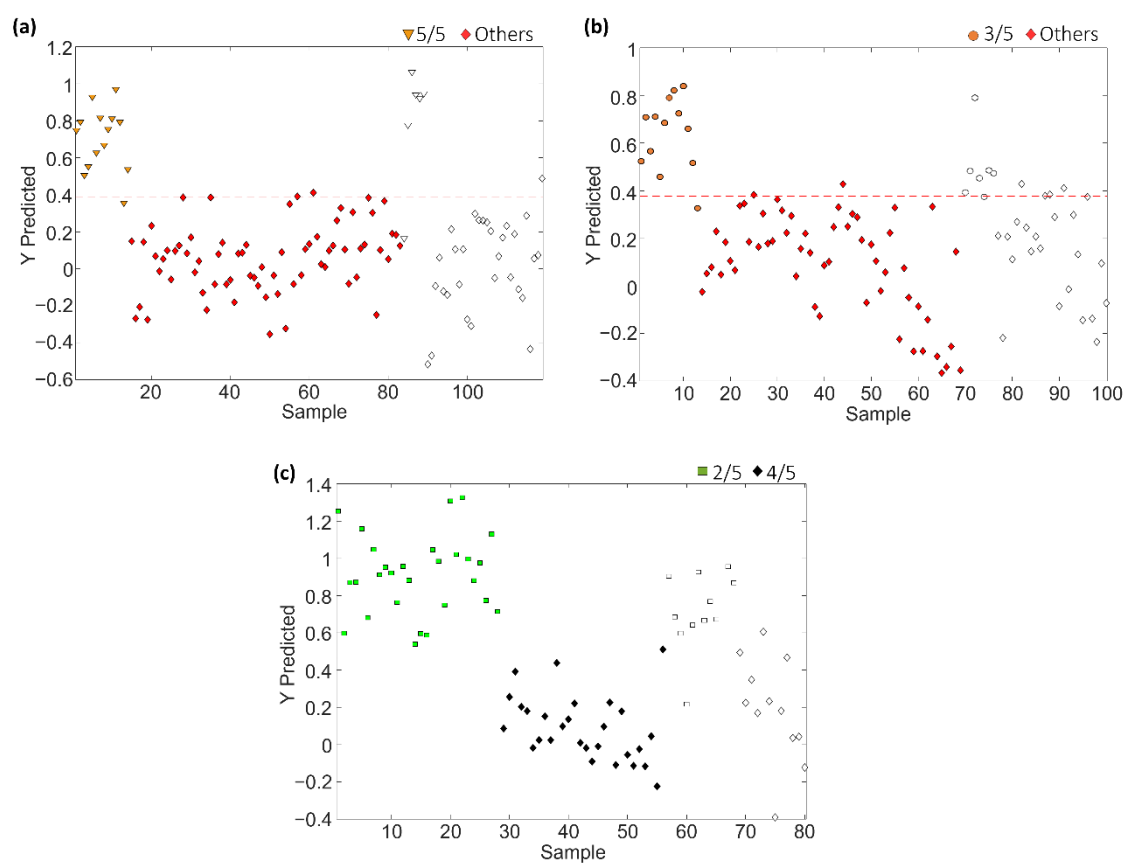

**Figure S6.** Paired PLS-DA plots of Y predicted *vs.* samples for set 2 within the tree classification framework: (a) 5/5 *vs.* Others, (b) 3/5 *vs.* Others and, (c) 2/5 *vs.* 4/5. Filled and empty symbols correspond to calibration and prediction sets, respectively. Red lines represent the threshold between classes.
